# Supplementary material for: Genetic Variation of the Host Plant Species Matters for Interactions with Above- and Belowground Herbivores
Source: MDPI journal article supplement (doi:10.3390/insects5030651), 2014-08-29
Supplement: s1 [file s1]

## Supplementary Material

**Table S1.** Two-Way ANOVAs for shoot and root nitrogen and C/N ratio in genotype M4 and E9.

|         |                       | <i>df</i> | <i>F</i> | <i>p</i>      |
|---------|-----------------------|-----------|----------|---------------|
| M4      | <i>Leaf N</i>         |           |          |               |
|         | AGH                   | 1         | 4.347    | <b>0.0424</b> |
|         | BGH                   | 1         | 1.08     | 0.3039        |
|         | AGH*BGH               | 1         | 0.197    | 0.6589        |
|         | <i>Leaf C/N Ratio</i> |           |          |               |
|         | AGH                   | 1         | 3.37     | 0.0726        |
|         | BGH                   | 1         | 0.782    | 0.381         |
|         | AGH*BGH               | 1         | 0.151    | 0.6995        |
|         | <i>Root N</i>         |           |          |               |
|         | AGH                   | 1         | 2.187    | 0.1457        |
|         | BGH                   | 1         | 4.834    | <b>0.0328</b> |
|         | AGH*BGH               | 1         | 0.043    | 0.8361        |
|         | <i>Root C/N Ratio</i> |           |          |               |
|         | AGH                   | 1         | 4.467    | <b>0.0398</b> |
|         | BGH                   | 1         | 2.666    | 0.109         |
| AGH*BGH | 1                     | 0.062     | 0.8045   |               |
| E9      | <i>Leaf N</i>         |           |          |               |
|         | AGH                   | 1         | 4.172    | <b>0.0466</b> |
|         | BGH                   | 1         | 2.32     | 0.1343        |
|         | AGH*BGH               | 1         | 0.008    | 0.9285        |
|         | <i>Leaf C/N Ratio</i> |           |          |               |
|         | AGH                   | 1         | 1.2437   | 0.2703        |
|         | BGH                   | 1         | 2.817    | 0.0998        |
|         | AGH*BGH               | 1         | 0.1513   | 0.699         |
|         | <i>Root N</i>         |           |          |               |
|         | AGH                   | 1         | 1.445    | 0.2352        |
|         | BGH                   | 1         | 0.4572   | 0.5022        |
|         | AGH*BGH               | 1         | 1.1856   | 0.2817        |
|         | <i>Root C/N Ratio</i> |           |          |               |
|         | AGH                   | 1         | 1.44     | 0.236         |
|         | BGH                   | 1         | 0.4735   | 0.4947        |
| AGH*BGH | 1                     | 1.1117    | 0.297    |               |

**Figure S1.** Principle component analysis of the FT-IR spectra from the dried and ground root material for M4 (green) and E9 (orange) over the spectral range of 3600–375  $\text{cm}^{-1}$ . Spectra are treated by first derivative and vector normalization.

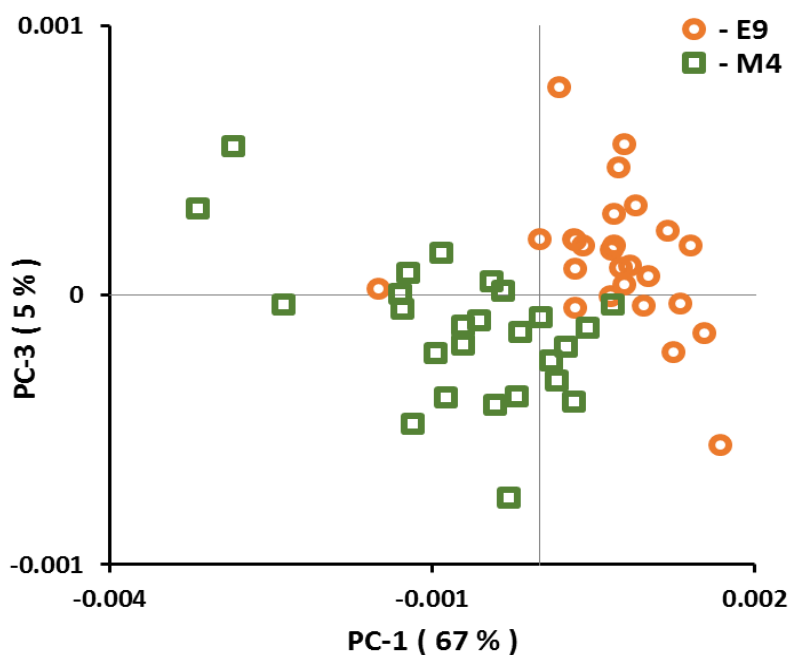

**Figure S2.** Averaged FT-IR spectra for the leaf material (a) and root material (b) of M4 (green) and E9 (orange). The dotted lines show the corresponding standard deviation indicating most variation between the genotypes for proteins (amid bands around 1600  $\text{cm}^{-1}$ ) and carbohydrates (1100–1000  $\text{cm}^{-1}$ ).

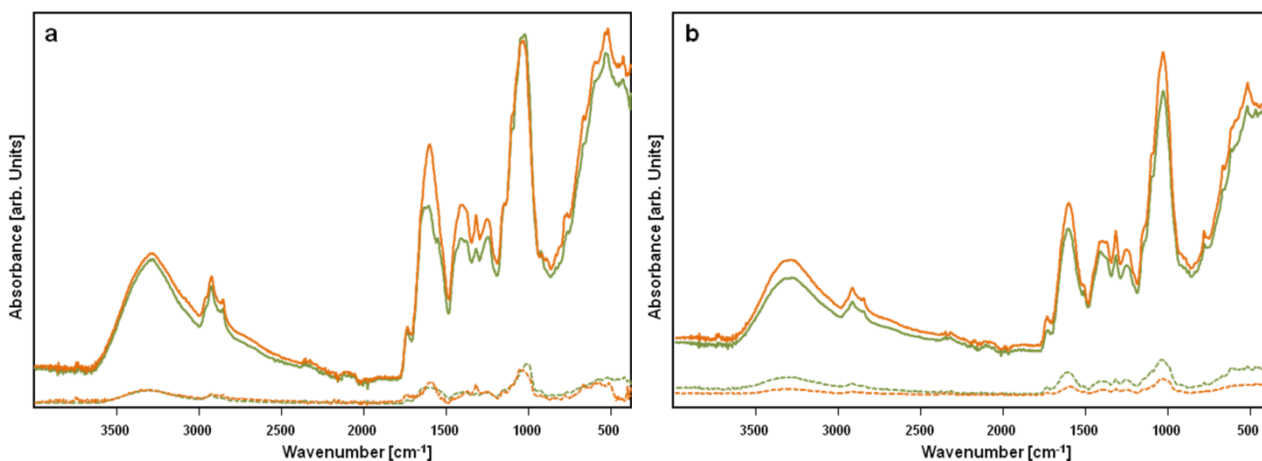

© 2014 by the authors; licensee MDPI, Basel, Switzerland. This article is an open access article distributed under the terms and conditions of the Creative Commons Attribution license (<http://creativecommons.org/licenses/by/3.0/>).
